# Supplementary material for: Ba10LuB18O32F13: the first example of borate in the Lu–B–O–F system with the unprecedented FBB [B9O22]
Source: Royal Society of Chemistry journal article supplement (doi:10.1039/d2qi00287f), 2022-01-01

## Supporting Information

### **Ba<sub>10</sub>LuB<sub>18</sub>O<sub>32</sub>F<sub>13</sub>: the First Example of Borate in Lu-B-O-F System with the Unprecedented FBB [B<sub>9</sub>O<sub>22</sub>] Group**

Jiongquan Chen,<sup>a,b</sup> Wenqi Jin,<sup>a,b</sup> Yanhui Zhang,<sup>a</sup> Yun Yang,<sup>a,b,\*</sup> Zhihua Yang<sup>a,b</sup> and Shilie Pan<sup>a,b,\*</sup>

<sup>a</sup> CAS Key Laboratory of Functional Materials and Devices for Special Environments; Xinjiang Technical Institute of Physics & Chemistry, CAS; Xinjiang Key Laboratory of Electronic Information Materials and Devices, 40-1 South Beijing Road, Urumqi 830011, China.

<sup>b</sup> Center of Materials Science and Optoelectronics Engineering, University of Chinese Academy of Sciences, Beijing 100049, China.

\*Corresponding authors: yangyun@ms.xjb.ac.cn, slpan@ms.xjb.ac.cn.

**Table S1.** Atomic coordinates ( $\times 10^4$ ), equivalent isotropic displacement parameters ( $\text{\AA}^2 \times 10^3$ ) and bond valence sums (BVS) for  $\text{Ba}_{10}\text{LuB}_{18}\text{O}_{32}\text{F}_{13}$ .  $U(eq)$  is defined as one third of the trace of the orthogonalized  $U_{ij}$  tensor.

| Atom  | x/a     | y/b     | z/c     | U(eq) | BVS   |
|-------|---------|---------|---------|-------|-------|
| Ba(1) | 6235(1) | 6177(1) | 9340(1) | 12(1) | 1.926 |
| Ba(2) | 5000    | 5000    | 4788(1) | 11(1) | 2.279 |
| Ba(3) | 2870(1) | 5000    | 6391(1) | 12(1) | 2.049 |
| Ba(4) | 5000    | 2230(1) | 1420(1) | 15(1) | 1.879 |
| Ba(5) | 5000    | 5000    | 1867(1) | 18(1) | 1.233 |
| Lu(1) | 5000    | 5000    | 7387(1) | 10(1) | 2.872 |
| B(1)  | 2500    | 2500    | 6131(9) | 7(2)  | 3.102 |
| B(2)  | 3426(6) | 3008(5) | 4816(6) | 11(2) | 3.075 |
| B(3)  | 3217(6) | 4244(5) | 3861(6) | 9(2)  | 3.057 |
| B(4)  | 4232(6) | 3299(5) | 3369(7) | 10(2) | 3.091 |
| B(5)  | 2944(6) | 3412(5) | 2449(7) | 11(2) | 3.047 |
| O(1)  | 2553(4) | 3230(3) | 6695(4) | 11(1) | 1.996 |
| O(2)  | 3236(3) | 2449(3) | 5515(4) | 11(1) | 2.056 |
| O(3)  | 2965(3) | 3654(3) | 4637(4) | 11(1) | 1.941 |
| O(4)  | 3030(5) | 5000    | 4295(6) | 9(1)  | 1.903 |
| O(6)  | 4114(3) | 2836(3) | 4307(4) | 13(1) | 2.005 |
| O(7)  | 3632(4) | 2993(3) | 2650(4) | 14(1) | 2.050 |
| O(8)  | 4063(3) | 4140(3) | 3587(4) | 8(1)  | 1.853 |
| O(9)  | 5000    | 3185(4) | 2946(5) | 9(2)  | 1.994 |
| O(10) | 2711(4) | 4068(3) | 2987(4) | 13(1) | 2.200 |
| F(1)  | 5000    | 5000    | 9213(7) | 19(2) | 0.864 |
| F(2)  | 5000    | 6249(4) | 8038(5) | 16(2) | 1.047 |
| F(3)  | 6211(4) | 5000    | 8025(5) | 14(1) | 1.234 |
| F(4)  | 4241(3) | 4221(2) | 6299(3) | 15(1) | 1.037 |
| F(5)  | 1358(5) | 5000    | 5722(5) | 18(2) | 1.085 |
| F(6)  | 5000    | 3683(4) | 627(5)  | 16(2) | 1.086 |

**Table S2.** Selected bond distances (Å) and angles (deg) for Ba<sub>10</sub>LuB<sub>18</sub>O<sub>32</sub>F<sub>13</sub>.

|                      |           |                 |           |
|----------------------|-----------|-----------------|-----------|
| Lu(1)-F(1)           | 2.487(10) | Ba(4)-O(2)#13   | 3.218(6)  |
| Lu(1)-F(2)           | 2.273(6)  | Ba(4)-O(2)#12   | 3.218(6)  |
| Lu(1)-F(2)#1         | 2.273(6)  | Ba(4)-O(6)#12   | 3.233(6)  |
| Lu(1)-F(3)           | 2.187(7)  | Ba(4)-O(6)#13   | 3.233(6)  |
| Lu(1)-F(3)#1         | 2.187(7)  | Ba(4)-O(7)#2    | 3.095(6)  |
| Lu(1)-F(4)           | 2.342(4)  | Ba(4)-O(7)      | 3.095(6)  |
| Lu(1)-F(4)#2         | 2.342(4)  | Ba(4)-O(9)      | 2.624(7)  |
| Lu(1)-F(4)#3         | 2.342(4)  | Ba(4)-F(2)#14   | 2.749(7)  |
| Lu(1)-F(4)#1         | 2.342(4)  | Ba(4)-F(4)#12   | 2.743(4)  |
| Ba(1)-O(3)#7         | 2.909(6)  | Ba(4)-F(4)#13   | 2.743(4)  |
| Ba(1)-O(10)#7        | 3.091(6)  | Ba(4)-F(6)      | 2.665(6)  |
| Ba(1)-O(6)#9         | 2.841(5)  | Ba(5)-O(8)      | 3.159(5)  |
| Ba(1)-O(2)#9         | 2.807(5)  | Ba(5)-O(8)#1    | 3.159(5)  |
| Ba(1)-F(1)           | 2.8483(8) | Ba(5)-O(8)#3    | 3.159(5)  |
| Ba(1)-F(2)           | 2.711(4)  | Ba(5)-O(8)#2    | 3.159(5)  |
| Ba(1)-F(3)           | 2.666(4)  | Ba(5)-F(5)#10   | 2.739(8)  |
| Ba(1)-F(5)#6         | 2.735(5)  | Ba(5)-F(5)#11   | 2.739(8)  |
| Ba(1)-F(6)#8         | 2.705(4)  | Ba(5)-F(6)      | 2.780(6)  |
| Ba(2)-O(8)#3         | 2.677(5)  | Ba(5)-F(6)#1    | 2.780(6)  |
| Ba(2)-O(8)           | 2.677(5)  | B(1)-O(1)       | 1.446(8)  |
| Ba(2)-O(8)#2         | 2.677(5)  | B(1)-O(2)#15    | 1.483(8)  |
| Ba(2)-O(8)#1         | 2.677(5)  | B(1)-O(2)       | 1.483(8)  |
| Ba(2)-F(4)           | 2.742(5)  | B(2)-O(2)       | 1.373(10) |
| Ba(2)-F(4)#2         | 2.742(5)  | B(2)-O(3)       | 1.348(10) |
| Ba(2)-F(4)#1         | 2.742(5)  | B(2)-O(6)       | 1.365(11) |
| Ba(2)-F(4)#3         | 2.742(5)  | B(3)-O(3)       | 1.507(9)  |
| Ba(3)-O(1)           | 3.042(5)  | B(3)-O(4)       | 1.432(8)  |
| Ba(3)-O(1)#3         | 3.042(5)  | B(3)-O(4)#3     | 1.432(9)  |
| Ba(3)-O(3)           | 3.291(5)  | B(4)-O(6)       | 1.508(10) |
| Ba(3)-O(3)#3         | 3.291(5)  | B(4)-O(7)       | 1.487(10) |
| Ba(3)-O(4)           | 2.868(7)  | B(4)-O(9)       | 1.411(10) |
| Ba(3)-F(3)#1         | 2.697(7)  | B(4)-O(9)#2     | 1.411(10) |
| Ba(3)-F(4)           | 2.625(5)  | B(5)-O(1)#5     | 1.352(10) |
| Ba(3)-F(4)#3         | 2.625(5)  | B(5)-O(7)       | 1.367(10) |
| Ba(3)-F(5)           | 2.666(8)  | B(5)-O(10)      | 1.377(10) |
| O(1)#15-B(1)-O(1)    | 115.9(9)  | O(4)-B(3)-O(3)  | 103.4(6)  |
| O(1)-B(1)-O(2)#15    | 107.5(3)  | O(4)-B(3)-O(10) | 112.6(7)  |
| O(1)-B(1)-O(2)       | 107.4(3)  | O(10)-B(3)-O(3) | 105.9(6)  |
| O(1)#15-B(1)-O(2)#15 | 107.4(3)  | O(8)-B(4)-O(6)  | 107.4(6)  |
| O(1)#15-B(1)-O(2)    | 107.5(3)  | O(8)-B(4)-O(7)  | 109.7(6)  |
| O(2)#15-B(1)-O(2)    | 111.1(9)  | O(9)-B(4)-O(8)  | 112.6(7)  |
| O(3)-B(2)-O(6)       | 123.5(7)  | O(9)-B(4)-O(6)  | 113.2(7)  |
| O(3)-B(2)-O(2)       | 123.0(8)  | O(9)-B(4)-O(7)  | 106.7(7)  |

|                 |          |                    |          |
|-----------------|----------|--------------------|----------|
| O(6)-B(2)-O(2)  | 113.5(7) | O(7)-B(4)-O(6)     | 107.1(6) |
| B(2)-O(2)-B(1)  | 122.8(6) | O(1)#25-B(5)-O(10) | 114.5(7) |
| O(8)-B(3)-O(3)  | 111.5(6) | O(1)#25-B(5)-O(7)  | 123.0(7) |
| O(8)-B(3)-O(10) | 108.2(6) | O(7)-B(5)-O(10)    | 122.5(7) |
| O(4)-B(3)-O(8)  | 114.8(7) |                    |          |

Symmetry transformations used to generate equivalent atoms:

|                         |                           |                           |                           |
|-------------------------|---------------------------|---------------------------|---------------------------|
| #1 $-x+1, -y+1, z$      | #2 $-x+1, y, z$           | #3 $x, -y+1, z$           | #4 $-x+1/2, -y+1, z+1/2$  |
| #5 $-x+1/2, y, z+1/2$   | #6 $x+1/2, y, z+1/2$      | #7 $x+1/2, -y+1, z+1/2$   | #8 $-x+1, -y+1, z+1$      |
| #9 $-x+1, y+1/2, z+1/2$ | #10 $x+1/2, y, z-1/2$     | #11 $-x+1/2, -y+1, z-1/2$ | #12 $-x+1, -y+1/2, z-1/2$ |
| #13 $x, -y+1/2, z-1/2$  | #14 $x, y-1/2, z-1/2$     | #15 $-x+1/2, -y+1/2, z$   | #16 $-x+1, y, z-1$        |
| #17 $x, -y+1, z-1$      | #18 $-x+1, -y+1, z-1$     | #19 $x-1/2, -y+1, z-1/2$  | #20 $x-1/2, y, z-1/2$     |
| #21 $x-1/2, y, z+1/2$   | #22 $-x+1, -y+1/2, z+1/2$ | #23 $x, y+1/2, z+1/2$     | #24 $-x+1, y-1/2, z-1/2$  |
| #25 $-x+1/2, y, z-1/2$  |                           |                           |                           |

**Table S3.** The fundamental building blocks (FBBs) of the anhydrous borates with 18 compositions of Boron in chemical formula.

| Compound                                                                            | Space Group | FBB                                                                                                                         |                                                                                      | ICSD Code |
|-------------------------------------------------------------------------------------|-------------|-----------------------------------------------------------------------------------------------------------------------------|--------------------------------------------------------------------------------------|-----------|
| $\text{Ba}_{8.35}\text{Pb}_{0.65}(\text{B}_3\text{O}_6)_6$                          | $R\bar{3}$  | $[\text{B}_3\text{O}_6]$<br>$3:[(3\Delta)]$                                                                                 | 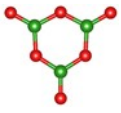   | 243527    |
| $\text{Ba}_{8.019}\text{Pb}_{0.981}\text{B}_{18}\text{O}_{36}$                      | $P3m1$      | $[\text{B}_3\text{O}_6]$<br>$3:[(3\Delta)]$                                                                                 |    | 432451    |
| $\text{Pb}_{1.13}\text{Ba}_{7.87}\text{B}_{18}\text{O}_{36}$                        | $R32$       | $[\text{B}_3\text{O}_6]$<br>$3:[(3\Delta)]$                                                                                 |    | 189013    |
| $\text{Cs}_2\text{O}(\text{B}_2\text{O}_3)_9$                                       | $P2_1$      | $[\text{B}_9\text{O}_{17}]$<br>$9: [(3:2\Delta + \text{T}) + 2(3:3\Delta)]$                                                 |    | 15331     |
| $\text{Na}_2\text{Cs}_2\text{Sr}(\text{B}_9\text{O}_{15})_2$                        | $P2_1/c$    | $[\text{B}_9\text{O}_{19}]$<br>$9:[3(3:2\Delta+\text{T})]$                                                                  |   | 193498    |
| $\text{Na}_2\text{Cs}_2\text{BaB}_{18}\text{O}_{30}$                                | $P2_1/c$    | $[\text{B}_9\text{O}_{19}]$<br>$9:[3(3:2\Delta+\text{T})]$                                                                  |  | 433333    |
| $\text{Na}_2\text{Cs}_2\text{PbB}_{18}\text{O}_{30}$                                | $P2_1/c$    | $[\text{B}_9\text{O}_{19}]$<br>$9:[3(3:2\Delta+\text{T})]$                                                                  |  | 433334    |
| $\text{Na}_2\text{Rb}_2\text{PbB}_{18}\text{O}_{30}$                                | $P2_1/c$    | $[\text{B}_9\text{O}_{19}]$<br>$9:[3(3:2\Delta+\text{T})]$                                                                  |  | 433335    |
| $\text{Ba}_4\text{K}_2\text{Zn}_5(\text{B}_3\text{O}_6)_3(\text{B}_9\text{O}_{19})$ | $P2_1/n$    | $[\text{B}_3\text{O}_6]+[\text{B}_9\text{O}_{19}]$<br>$3:[(3\Delta)]+ 9:[3(3:2\Delta + \text{T}) + 3\Delta + 3(3:2\Delta +$ |  | 193185    |

---

|                                                                                         |             |                                                                                                        |                                                                                                                                                                          |        |
|-----------------------------------------------------------------------------------------|-------------|--------------------------------------------------------------------------------------------------------|--------------------------------------------------------------------------------------------------------------------------------------------------------------------------|--------|
|                                                                                         |             | T)]                                                                                                    | 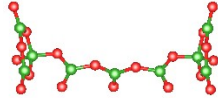                                                                                       |        |
| $\text{Ba}_4\text{Na}_2\text{Zn}_4(\text{B}_3\text{O}_6)_2(\text{B}_{12}\text{O}_{24})$ | $P\bar{1}$  | $[\text{B}_3\text{O}_6]+[\text{B}_{12}\text{O}_{24}]$<br>3:[(3 $\Delta$ )]+12:[4(3:2 $\Delta$<br>+ T)] | <br> | 188636 |
| $\text{Sr}_8\text{MgB}_{18}\text{O}_{36}$                                               | $R\bar{3}c$ | $[\text{B}_{18}\text{O}_{36}]$<br>18:[6(3:2 $\Delta$ +T)]                                              |                                                                                        | 250745 |
| $\text{NaSr}_7\text{AlB}_{18}\text{O}_{36}$                                             | $R\bar{3}c$ | $[\text{B}_{18}\text{O}_{36}]$<br>36:[6(3:2 $\Delta$ +T)]                                              |                                                                                       | 427849 |
| $\text{ZnV}_{12}\text{B}_{18}\text{O}_{63}$                                             | $P\bar{1}$  | $[\text{B}_{18}\text{O}_{42}]$<br>18:[6(3:2 $\Delta$ + T)]                                             |                                                                                      | 248355 |

---

**Fig. S1.** (a) The coordination environment of  $\text{Lu}^{3+}$  in  $\text{Ba}_2\text{Lu}(\text{BO}_3)_2\text{Cl}$ . (b) The coordination environment of  $\text{Lu}^{3+}$  in  $\text{Ba}_{10}\text{LuB}_{18}\text{O}_{32}\text{F}_{13}$ .

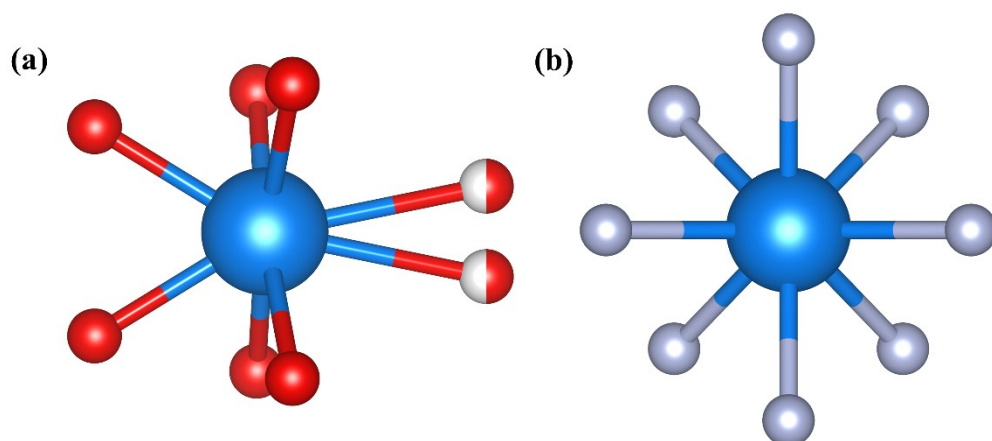

**Fig. S2.** The crystal of  $\text{Ba}_{10}\text{LuB}_{18}\text{O}_{32}\text{F}_{13}$  for EDS measurement.

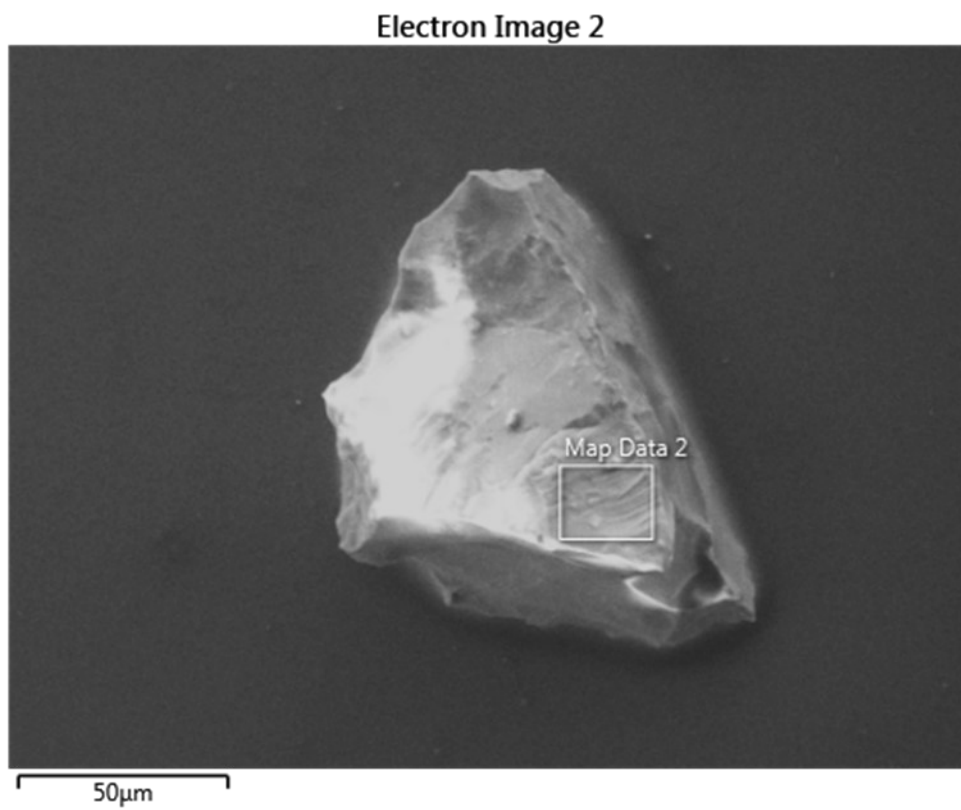

**Fig. S3.** The result of EDS for  $\text{Ba}_{10}\text{LuB}_{18}\text{O}_{13}\text{F}_{13}$ .

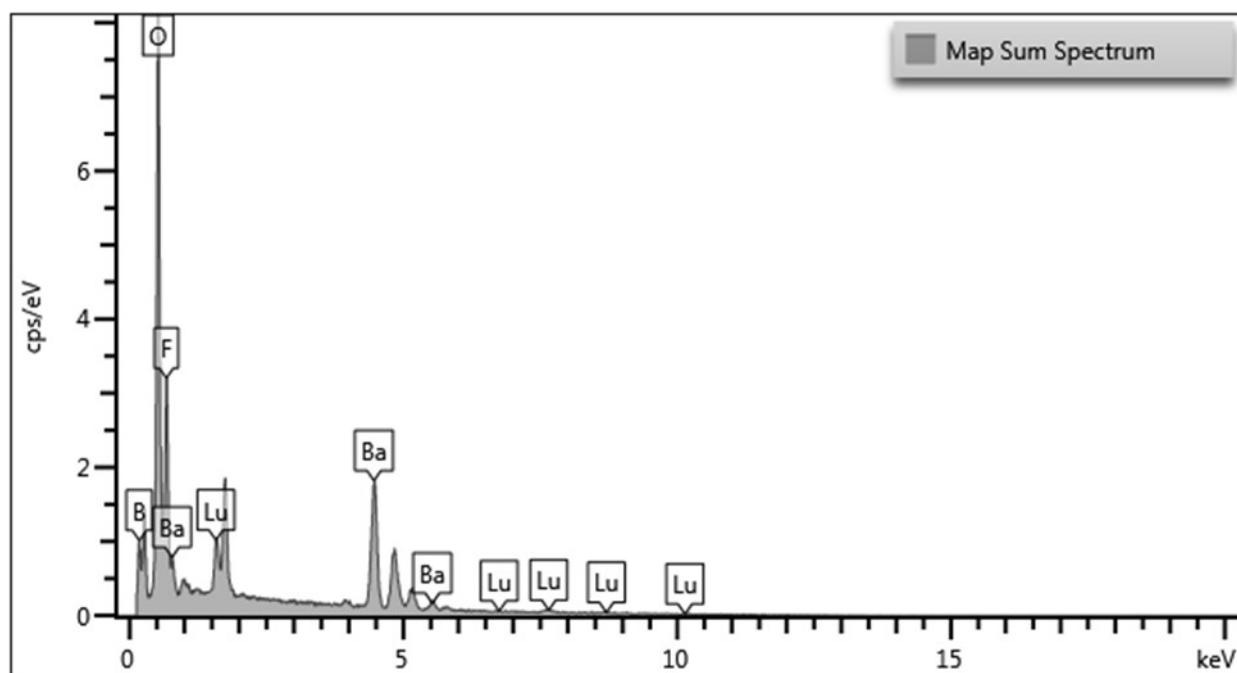

**Fig. S4.** Powder XRD patterns of  $\text{Ba}_{10}\text{LuB}_{18}\text{O}_{32}\text{F}_{13}$ .

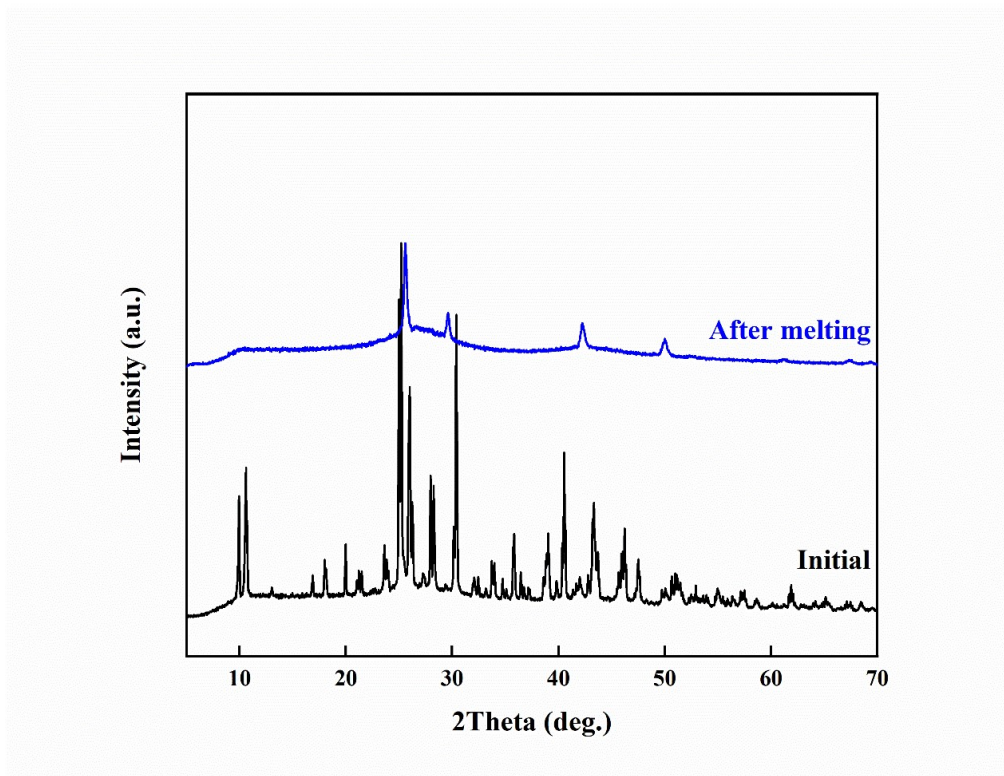



Fig. S5. The IR spectrum of  $\text{Ba}_{10}\text{LuB}_{18}\text{O}_{32}\text{F}_{13}$ .

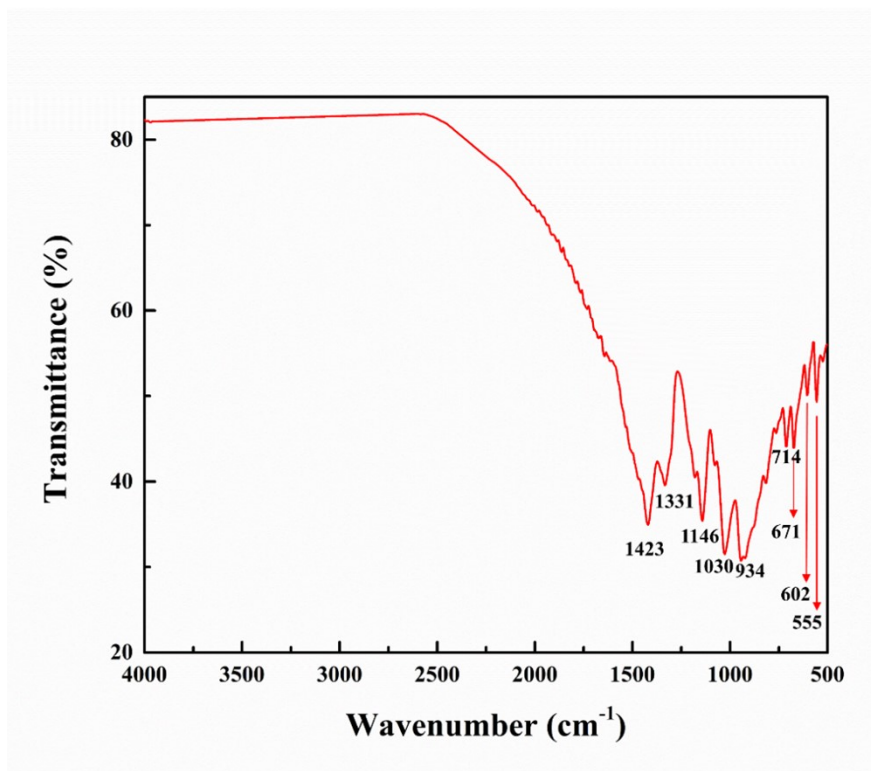

Fig. S6. The band gap of  $\text{Ba}_{10}\text{LuB}_{18}\text{O}_{32}\text{F}_{13}$  calculated by using GGA.

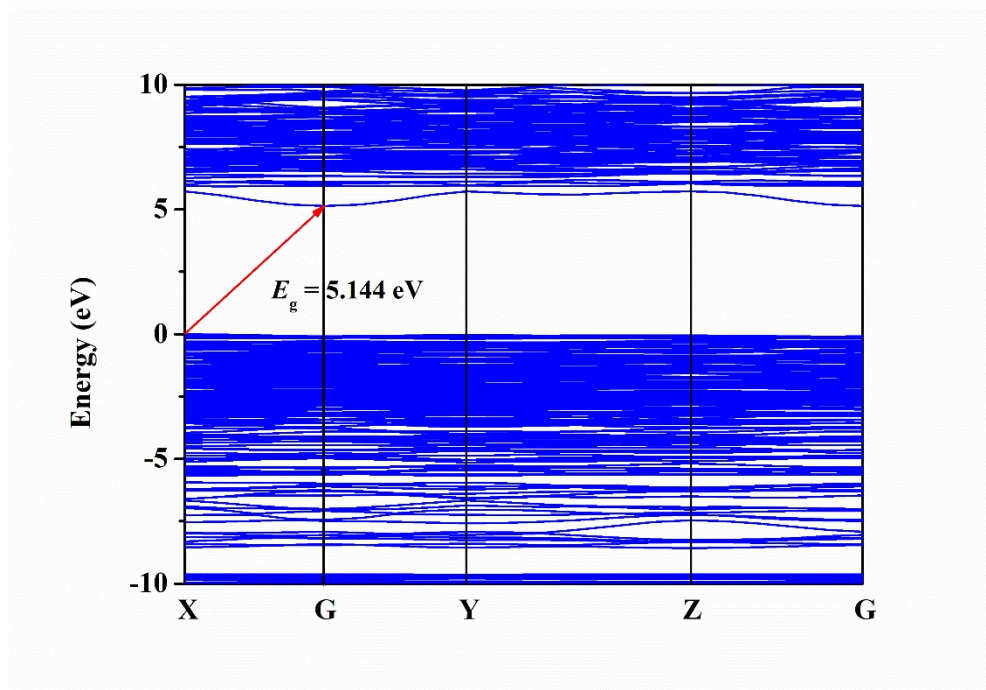

Supplement: d2qi00287f1.pdf [file d2qi00287f1.pdf]
